# Supplementary material for: Excess explosivity driven by melt inclusions during the 946 CE Plinian eruption of Baekdusan
Source: Research Square preprint supplement (doi:10.21203/rs.3.rs-2559876/v1), 2023-03-14
Supplement: Supplementary file 1 [file 51466f39d8147d154cc669cc.xlsx]

## Sheet: Title
Kim et al.
Cryptic magma mixing and two-step bubble formation during the 946 CE Baekdusan Eruption
Extended data 3: Vesicularity and volume fraction measurement data

## Sheet: Results
Samples	Max	Min	Avg. BP	T. Avg. BP	T. Avg. Ex
17-1s (MP1)	16.1668	9.30141	12.4489	15.8145	84.1855
17-1L2 (MP2)	27.0875	20.0568	23.7871
17-1_L1 (MP3)	19.5649	16.2198	17.9041
17-1_B (MP3)	20.9068	16.1505	18.5982
16-6B3_SP (MP4)	7.12069	5.62618	6.33431
Sample	Por. Out	Por. In	Vol. Dif.	Degass Rat.	T. avg. in	T. avg. out	G. rat. BP	G. rat. Ex	Gin/Gtot
17-1s (MP1)	64.3721	85.379	21.0069	24.6043	87.2526	63.5326	13.7986	53.4852	20.508
17-1L2 (MP2)	59.3701	85.7314	26.3614	30.7488
17-1_L1 (MP3)	66.2692	90.562	24.2928	26.8245
17-1_B (MP3)	65.7676	90.4682	24.7006	27.3031
16-6B3_SP (MP4)	61.884	84.1222	22.2382	26.4356
		82.8494
		88.0221
