# Supplementary material for: Excess explosivity driven by melt inclusions during the 946 CE Plinian eruption of Baekdusan
Source: Research Square preprint supplement (doi:10.21203/rs.3.rs-2559876/v1), 2023-03-14
Supplement: Supplementary file 2 [file 836b32fa72b40a59993b4d84.xlsx]

## Sheet: TITLE
Kim et al.
Cryptic magma mixing and two-step bubble formation during the 946 CE Baekdusan Eruption
Extended data 4: Electron microprobe data
Data separated by sample measured

## Sheet: BP1
Glass in bubble pocket (BP1)
Element		SiO2	TiO2	Al2O3	FeO	MnO	MgO	CaO	Na2O	K2O	P2O5	F	Cl	Total		Cation	Si	Ti	Al	Fe	Mn	Mg	Ca	Na	K	P	F	Cl	Total
17-1_S1	BP1_g_in_1	66.3718	0.384589	15.5604	4.44314	0.158009	0.127202	1.14979	5.92982	5.66448	0.0367695	0.0685701	0.10534	100		BP1_g_in_1	9.0741	0.0395	2.5075	0.5081	0.0183	0.026	0.1684	1.5719	0.988	0.0043	0.0297	0.0243	14.9601
	BP1_g_in_2	66.3307	0.391468	15.3676	4.40753	0.123463	0.0833124	1.18946	5.96838	5.78871	0.0582183	0.173651	0.11744	100		BP1_g_in_2	9.0857	0.0403	2.4812	0.5049	0.0143	0.017	0.1746	1.5853	1.0117	0.0067	0.0749	0.0271	15.0237
	BP1_g_in_3	65.9833	0.375106	15.6808	4.50631	0.139152	0.0937765	1.14952	6.14992	5.74658	0.0907514	-	0.0847013	100		BP1_g_in_3	9.0319	0.0386	2.53	0.5158	0.0161	0.0192	0.1686	1.6323	1.0035	0.0106	-	0.0196	14.9863
	BP1_g_in_4	66.185	0.348118	15.8736	4.13377	0.115047	0.0912445	1.08006	6.27901	5.70179	0.0892609	-	0.103146	100		BP1_g_in_4	9.0395	0.0357	2.5555	0.4721	0.0133	0.0186	0.158	1.663	0.9935	0.0104	-	0.0239	14.9836
	BP1_g_in_5	66.4427	0.403757	15.2923	4.55612	0.125679	0.0999495	1.11627	6.03458	5.67733	0.0366152	0.102918	0.111825	100		BP1_g_in_5	9.0943	0.0416	2.4672	0.5215	0.0146	0.0205	0.1637	1.6016	0.9913	0.0042	0.0444	0.0259	14.9908
	BP1_g_in_6	66.6906	0.375503	15.3838	4.25964	0.148821	0.0788457	1.14031	6.13617	5.64634	0.0443507	-	0.0956004	100		BP1_g_in_6	9.1036	0.0386	2.4752	0.4863	0.0172	0.016	0.1668	1.6243	0.9833	0.0051	-	0.022	14.9384
	BP1_g_in_7	66.4127	0.397848	15.0794	4.68665	0.124327	0.113387	1.16868	6.11094	5.74591	0.0487363	-	0.111397	100		BP1_g_in_7	9.0963	0.041	2.4345	0.5369	0.0144	0.0232	0.1715	1.623	1.0041	0.0057	-	0.0258	14.9765
	BP1_g_in_8	65.8807	0.402246	15.4094	4.66767	0.126017	0.140131	1.16036	6.17181	5.83106	-	0.103838	0.106862	100		BP1_g_in_8	9.0466	0.0416	2.4941	0.5361	0.0146	0.0287	0.1707	1.6433	1.0216	-	0.0452	0.0249	15.0675
	BP1_g_in_9	66.3087	0.370902	15.5629	4.2574	0.122637	0.133605	1.11869	6.27542	5.74799	-	-	0.101699	100		BP1_g_in_9	9.0677	0.0382	2.5085	0.4869	0.0142	0.0272	0.1639	1.6639	1.0028	-	-	0.0236	14.997
	BP1_g_in_10	65.323	0.264129	16.5481	3.64379	0.105051	0.0560275	1.11555	6.61024	5.78183	0.0250123	0.44822	0.0790387	100		BP1_g_in_10	8.9654	0.0273	2.6771	0.4183	0.0123	0.0114	0.1641	1.7591	1.0123	0.0029	0.1927	0.0182	15.2611
	BP1_g_in_11	65.9193	0.404242	14.8713	5.15657	0.14935	0.159307	1.35809	5.86947	5.80375	0.0567531	0.102554	0.14935	100		BP1_g_in_11	9.0723	0.0418	2.4124	0.5936	0.0175	0.0327	0.2002	1.5663	1.019	0.0066	0.0446	0.0347	15.0417
	BP1_g_in_12	66.5944	0.483931	14.8683	4.65539	0.132542	0.202408	1.16513	6.11951	5.59654	0.054455	-	0.127404	100		BP1_g_in_12	9.1132	0.0498	2.3983	0.5328	0.0154	0.0413	0.1709	1.6237	0.977	0.0064	-	0.0295	14.9584
	BP1_g_in_13	66.4121	0.391753	14.9767	4.85735	0.140477	0.0712279	1.20197	5.83475	5.92576	0.057378	-	0.130584	100		BP1_g_in_13	9.1066	0.0404	2.4206	0.557	0.0163	0.0146	0.1767	1.5514	1.0367	0.0066	-	0.0303	14.9572
Host glass
Element		SiO2	TiO2	Al2O3	FeO	MnO	MgO	CaO	Na2O	K2O	P2O5	F	Cl	Total		Cation	Si	Ti	Al	Fe	Mn	Mg	Ca	Na	K	P	F	Cl	Total
17-1_S1	BP1_g_out_1	71.9276	0.232054	11.7299	4.26145	0.113991	0.032569	0.414237	5.67718	5.06549	-	0.176076	0.369454	100		BP1_g_out_1	9.7074	0.0235	1.8659	0.481	0.013	0.0065	0.0599	1.4856	0.8723	-	0.0748	0.084	14.674
	BP1_g_out_2	72.6692	0.224675	11.197	4.29334	0.118465	-	0.325779	5.61484	5.03886	0.00817002	0.10621	0.403395	100		BP1_g_out_2	9.7876	0.0227	1.7776	0.4837	0.0136	-	0.0471	1.4665	0.8659	0.001	0.045	0.0915	14.6023
	BP1_g_out_3	73.1651	0.195927	10.9207	4.30938	0.0713374	0.00100475	0.298411	5.45782	4.90118	-	0.244155	0.435058	100		BP1_g_out_3	9.8463	0.0198	1.7323	0.4851	0.0081	0.0002	0.043	1.4241	0.8416	-	0.103	0.0984	14.6019
	BP1_g_out_4	72.5227	0.233513	11.1294	4.45423	0.0637788	-	0.378558	5.665	4.94388	-	0.213968	0.395017	100		BP1_g_out_4	9.7835	0.0237	1.7696	0.5025	0.0073	-	0.0548	1.4819	0.8509	-	0.0904	0.0897	14.6543
	BP1_g_out_5	72.9034	0.228812	10.7461	4.35348	0.101806	-	0.36993	5.41993	4.90787	-	0.591686	0.376986	100		BP1_g_out_5	9.8484	0.0233	1.7111	0.4919	0.0117	-	0.0535	1.4198	0.8459	-	0.2494	0.0851	14.7401
	BP1_g_out_6	72.6996	0.247058	10.8244	4.41116	0.0799606	-	0.334194	5.68131	4.96576	0.00820109	0.319843	0.428507	100		BP1_g_out_6	9.8177	0.0251	1.7231	0.4982	0.0091	-	0.0483	1.4878	0.8556	0.001	0.1351	0.0972	14.6982
	BP1_g_out_7	70.7922	0.29349	12.4388	4.65277	0.105176	0.106177	0.688149	5.13257	5.42907	0.0120201	0.0691154	0.280468	100		BP1_g_out_7	9.5795	0.0298	1.9839	0.5266	0.0121	0.0214	0.0998	1.3467	0.9372	0.0014	0.0295	0.0641	14.6321
Feldspar in BP-1
Element		SiO2	TiO2	Al2O3	FeO	MnO	MgO	Cr2O3	CaO	Na2O	K2O	Total				Cation	Si	Ti	Al	Fe	Mn	Mg	Cr	Ca	Na	K	Total
17-1_S1	BP1_f_1	66.266	0.036	19.298	0.155	-	-	-	0.935	6.262	7.227	100.233				BP1_f_1	2.968	0.00123333	1.0188	0.0058	-	-	-	0.0449	0.543833	0.412933	4.99807
	BP1_f_2	66.37	0.037	19.751	0.182	-	-	-	0.95	6.309	7.136	100.74				BP1_f_2	2.95707	0.00123333	1.03727	0.0068	-	-	-	0.0453667	0.545067	0.405633	4.99893
	BP1_f_3	65.984	0.069	19.2	0.196	-	-	-	0.811	6.202	7.714	100.229				BP1_f_3	2.9658	0.00233333	1.01723	0.00736667	-	-	-	0.0390333	0.5405	0.442367	5.02583
	BP1_f_4	66.91	0.034	18.944	0.215	0.039	-	-	0.631	6.199	8.018	101.197				BP1_f_4	2.9828	0.00113333	0.995433	0.00803333	0.00146667	-	-	0.0301333	0.535833	0.456	5.05253
	BP1_f_5	66.457	0.051	18.98	0.217	-	-	-	0.882	6.396	7.409	100.417				BP1_f_5	2.97603	0.00173333	1.00183	0.00813333	-	-	-	0.0423333	0.5554	0.4233	5.00993
	BP1_f_6	67.165	0.082	19.528	0.13	-	-	-	1.108	6.667	6.874	101.559				BP1_f_6	2.96657	0.00273333	1.01667	0.0048	-	-	-	0.0524333	0.571033	0.387367	5.00203
	BP1_f_7	66.203	0.056	18.881	0.203	0.019	-	-	0.757	6.198	7.539	99.905				BP1_f_7	2.9789	0.00186667	1.00143	0.00763333	0.000733333	-	-	0.0364667	0.540767	0.432767	5.00243
	BP1_f_8	66.826	0.052	19.153	0.139	-	-	-	0.75	6.206	7.739	100.988				BP1_f_8	2.97887	0.00173333	1.00637	0.00516667	-	-	-	0.0358333	0.536433	0.4401	5.03433

## Sheet: BP2
Glass in bubble pocket (BP2)
Element		SiO2	TiO2	Al2O3	FeO	MnO	MgO	CaO	Na2O	K2O	P2O5	F	Cl	Total		Cation	Si	Ti	Al	Fe	Mn	Mg	Ca	Na	K	P	F	Cl	Total
17-1_L1	BP2_in_G1	74.8086	0.210259	9.68977	4.20022	0.0575237	-	0.220177	5.23565	4.83993	0.00396715	0.241996	0.491927	100		BP2_in_G1	10.0282	0.0212	1.5311	0.4709	0.0066	-	0.0317	1.3608	0.8277	0.0005	0.1015	0.1108	14.491
	BP2_in_G2	74.5538	0.208281	9.96662	4.16364	0.137526	0.00298969	0.22024	5.4193	4.83432	-	0.0348797	0.458418	100		BP2_in_G2	9.9838	0.021	1.5732	0.4663	0.0156	0.0005	0.0315	1.4073	0.8259	-	0.0146	0.1035	14.4432
	BP2_in_G3	74.4232	0.194611	9.99401	4.11178	0.0449102	-	0.199601	5.45908	4.73154	-	0.381238	0.46008	100		BP2_in_G3	9.9891	0.0197	1.5812	0.4615	0.0051	-	0.0286	1.4208	0.8102	-	0.1599	0.1035	14.5797
	BP2_in_G4	74.6291	0.209965	10.0415	4.16546	0.0467694	0.00597057	0.197029	5.67801	4.39533	0.0368185	0.10349	0.490581	100		BP2_in_G4	9.9805	0.0211	1.5829	0.4659	0.0053	0.0012	0.0283	1.4725	0.7499	0.0042	0.0436	0.1105	14.466
	BP2_in_G5	74.1543	0.217275	9.91721	4.28214	0.101596	-	0.196151	5.61798	4.54971	-	0.486858	0.476799	100		BP2_in_G5	9.9762	0.022	1.5726	0.4818	0.0116	-	0.0282	1.4654	0.7809	-	0.2046	0.1073	14.6506
	BP2_in_G6	74.2454	0.176091	10.2967	4.23545	0.0731137	-	0.229639	5.41659	4.86361	-	-	0.463397	100		BP2_in_G6	9.9456	0.0177	1.6257	0.4745	0.0083	-	0.033	1.4068	0.8312	-	-	0.1047	14.4475
	BP2_in_G7	75.0945	0.165085	9.75227	4.14854	0.0794856	-	0.197695	5.20732	4.69169	0.0214	0.177314	0.464685	100		BP2_in_G7	10.0397	0.0166	1.5369	0.4638	0.009	-	0.0283	1.3499	0.8002	0.0024	0.0744	0.1046	14.4258
	BP2_in_G8	74.4135	0.218662	9.95466	4.22813	0.0634825	-	0.198509	5.20455	4.8549	0.0211608	0.350665	0.491737	100		BP2_in_G8	9.9914	0.0221	1.5755	0.4747	0.0072	-	0.0286	1.3551	0.8316	0.0024	0.1472	0.1106	14.5464
	BP2_in_G9	74.4829	0.23127	10.0924	4.18397	0.0583202	0.00402208	0.232275	5.31116	4.94213	0.0211159	0.0351932	0.405225	100		BP2_in_G9	9.9695	0.0232	1.5922	0.4684	0.0066	0.0009	0.0333	1.3784	0.844	0.0024	0.0148	0.0916	14.4254
	BP2_in_G10	74.4628	0.201081	10.0378	4.12926	0.0741358	-	0.209205	5.36012	4.76805	-	0.282325	0.475281	100		BP2_in_G10	9.9864	0.0203	1.5868	0.4631	0.0085	-	0.03	1.394	0.8157	-	0.1185	0.107	14.5303
	BP2_in_G11	74.5808	0.202512	10.0759	4.06711	0.118132	0.00198541	0.191592	5.35564	4.84936	0.0248176	0.104234	0.427855	100		BP2_in_G11	9.9813	0.0204	1.5895	0.4553	0.0134	0.0003	0.0274	1.3898	0.828	0.0028	0.0437	0.0964	14.4484
	BP2_in_G12	74.585	0.188349	10.1043	4.21216	0.0342452	-	0.229644	5.32714	4.86282	-	0.0352524	0.421014	100		BP2_in_G12	9.9788	0.019	1.5934	0.4713	0.0039	-	0.0329	1.3821	0.8301	-	0.0148	0.0951	14.4215
	BP2_in_G13	74.4439	0.191902	9.99498	4.23993	0.0502361	0.00502361	0.226062	5.25872	4.73325	-	0.383804	0.472219	100		BP2_in_G13	9.9923	0.0193	1.5813	0.476	0.0057	0.001	0.0325	1.3687	0.8106	-	0.161	0.1062	14.5547
Host Glass
Element		SiO2	TiO2	Al2O3	FeO	MnO	MgO	Cr2O3	CaO	Na2O	K2O	Total				Cation	Si	Ti	Al	Fe	Mn	Mg	Cr	Ca	Na	K	Total
17-1_L1	BP2_f_1	68.025	0.011	18.182	0.498	0.035	-	-	0.012	7.259	6.531	100.594				BP2_f_1	3.02397	0.000366667	0.952667	0.0185333	0.0013	-	-	0.000566667	0.625733	0.370367	4.99507
	BP2_f_2	68.504	-	18.14	0.595	-	0.001	-	0.003	7.409	6.466	101.187				BP2_f_2	3.02937	-	0.9455	0.022	-	6.66667e-05	-	0.000133333	0.635333	0.3648	5.01217
	BP2_f_3	68.047	0.008	18.278	0.637	0.011	-	-	0.006	7.343	6.576	100.967				BP2_f_3	3.01953	0.000266667	0.956	0.0236333	0.0004	-	-	0.0003	0.6318	0.3723	5.01893
	BP2_f_4	67.256	-	17.719	0.598	-	-	-	0.002	7.29	6.673	99.55				BP2_f_4	3.02797	-	0.9403	0.0225	-	-	-	0.000133333	0.6364	0.3833	5.01107
	BP2_f_5	67.906	0.022	17.988	0.527	-	-	-	0.008	7.361	6.587	100.421				BP2_f_5	3.02753	0.000766667	0.9453	0.0196333	-	-	-	0.000366667	0.636333	0.374633	5.00967
	BP2_f_6	67.598	-	18.177	0.531	0.006	-	-	0.022	7.418	6.405	100.157				BP2_f_6	3.0197	-	0.957067	0.0198333	0.000233333	-	-	0.00106667	0.642567	0.365033	5.00553
	BP2_f_7	67.972	0.018	18.342	0.383	0.009	-	-	0.013	7.566	6.428	100.732				BP2_f_7	3.018	0.0006	0.9599	0.0142	0.000333333	-	-	0.000633333	0.651367	0.3641	5.0092
Feldspar in BP2
Element		SiO2	TiO2	Al2O3	FeO	MnO	MgO	Cr2O3	CaO	Na2O	K2O	Total				Cation	Si	Ti	Al	Fe	Mn	Mg	Cr	Ca	Na	K	Total
17-1_L1	BP2_f_1	68.025	0.011	18.182	0.498	0.035	-	-	0.012	7.259	6.531	100.594				BP2_f_1	3.02397	0.000366667	0.952667	0.0185333	0.0013	-	-	0.000566667	0.625733	0.370367	4.99507
	BP2_f_2	68.504	-	18.14	0.595	-	0.001	-	0.003	7.409	6.466	101.187				BP2_f_2	3.02937	-	0.9455	0.022	-	6.66667e-05	-	0.000133333	0.635333	0.3648	5.01217
	BP2_f_3	68.047	0.008	18.278	0.637	0.011	-	-	0.006	7.343	6.576	100.967				BP2_f_3	3.01953	0.000266667	0.956	0.0236333	0.0004	-	-	0.0003	0.6318	0.3723	5.01893
	BP2_f_4	67.256	-	17.719	0.598	-	-	-	0.002	7.29	6.673	99.55				BP2_f_4	3.02797	-	0.9403	0.0225	-	-	-	0.000133333	0.6364	0.3833	5.01107
	BP2_f_5	67.906	0.022	17.988	0.527	-	-	-	0.008	7.361	6.587	100.421				BP2_f_5	3.02753	0.000766667	0.9453	0.0196333	-	-	-	0.000366667	0.636333	0.374633	5.00967
	BP2_f_6	67.598	-	18.177	0.531	0.006	-	-	0.022	7.418	6.405	100.157				BP2_f_6	3.0197	-	0.957067	0.0198333	0.000233333	-	-	0.00106667	0.642567	0.365033	5.00553
	BP2_f_7	67.972	0.018	18.342	0.383	0.009	-	-	0.013	7.566	6.428	100.732				BP2_f_7	3.018	0.0006	0.9599	0.0142	0.000333333	-	-	0.000633333	0.651367	0.3641	5.0092

## Sheet: BP3
Glass in bubble pocket (BP3)
Element		SiO2	TiO2	Al2O3	FeO	MnO	MgO	CaO	Na2O	K2O	P2O5	F	Cl	Total		Cation	Si	Ti	Al	Fe	Mn	Mg	Ca	Na	K	P	F	Cl	Total
17-1_L2	BP3_g_in_1	67.9482	0.271098	14.4626	4.15181	0.112455	0.0030122	0.858477	6.18706	5.67699	-	0.173703	0.154626	100		BP3_g_in_1	9.2663	0.0278	2.3248	0.4736	0.013	0.0007	0.1254	1.6361	0.9877	-	0.0745	0.0356	14.9655
	BP3_g_in_2	67.802	0.271014	14.5761	4.1461	0.111237	0.0323598	0.874727	6.15747	5.75398	-	0.105169	0.169889	100		BP3_g_in_2	9.2473	0.0278	2.3432	0.473	0.0128	0.0067	0.1278	1.6283	1.0013	-	0.0451	0.039	14.9523
	BP3_g_in_3	68.223	0.240969	14.3227	4.37428	0.0945951	0.0268849	0.872267	6.11582	5.53232	0.0159318	-	0.181224	100		BP3_g_in_3	9.2853	0.0247	2.2977	0.4979	0.0109	0.0054	0.1272	1.614	0.9606	0.0019	-	0.0418	14.8674
	BP3_g_in_4	67.9567	0.294232	14.4744	4.14628	0.0880696	-	0.798631	6.20991	5.46432	-	0.3803	0.187148	100		BP3_g_in_4	9.2746	0.0302	2.3285	0.4733	0.0102	-	0.1168	1.6433	0.9514	-	0.1627	0.0429	15.0339
	BP3_g_in_5	68.5346	0.273042	14.1664	4.29421	0.111203	-	0.828063	6.01487	5.48964	-	0.137018	0.150918	100		BP3_g_in_5	9.3227	0.028	2.2713	0.4885	0.0128	-	0.1208	1.5864	0.9526	-	0.0589	0.0347	14.8767
	BP3_g_in_6	68.2524	0.279185	14.0179	4.32489	0.10929	-	0.863388	6.28614	5.43169	0.0288127	0.239444	0.166915	100		BP3_g_in_6	9.309	0.0287	2.2536	0.4934	0.0126	-	0.1262	1.6625	0.9452	0.0033	0.1029	0.0385	14.9759
	BP3_g_in_7	68.178	0.289147	14.0559	4.33124	0.120229	0.0586242	0.841605	6.15852	5.48087	0.00794905	0.308026	0.169911	100		BP3_g_in_7	9.3055	0.0297	2.2613	0.4944	0.0138	0.012	0.123	1.6299	0.9544	0.0009	0.1322	0.0391	14.9963
	BP3_g_in_8	68.0693	0.308088	14.3778	4.20785	0.131464	0.024085	0.884121	6.28719	5.44221	0.00802834	0.0692444	0.190673	100		BP3_g_in_8	9.2706	0.0315	2.3081	0.4793	0.0152	0.0049	0.129	1.6604	0.9457	0.001	0.0298	0.0439	14.9194
	BP3_g_in_9	68.2573	0.285132	14.1843	4.45221	0.0910837	0.0306912	0.838564	6.262	5.3779	0.0287112	-	0.192068	100		BP3_g_in_9	9.2904	0.0292	2.2757	0.5068	0.0106	0.0062	0.1223	1.6527	0.9338	0.0033	-	0.0443	14.8753
	BP3_g_in_10	68.3461	0.314084	14.093	4.35344	0.100388	-	0.838883	6.30554	5.40503	-	0.0685817	0.174933	100		BP3_g_in_10	9.3057	0.0322	2.2618	0.4958	0.0116	-	0.1224	1.6648	0.9389	-	0.0295	0.0402	14.903
	BP3_g_in_11	68.5481	0.282263	14.3595	4.25091	0.0907631	0.00299219	0.855766	5.91257	5.50064	0.0119688	-	0.184518	100		BP3_g_in_11	9.3089	0.0288	2.2985	0.4828	0.0104	0.0007	0.1245	1.557	0.953	0.0014	-	0.0424	14.8084
	BP3_g_in_12	68.0318	0.291153	14.4475	4.36528	0.0940182	0.0768321	0.853241	6.17386	5.43385	0.0161752	0.0353832	0.18096	100		BP3_g_in_12	9.2617	0.0298	2.3183	0.4971	0.0108	0.0156	0.1244	1.6298	0.9438	0.0019	0.015	0.0416	14.8898
	BP3_g_in_13	68.5483	0.266093	14.5255	4.13689	0.0707587	0.014949	0.843125	6.03442	5.37467	0.0119592	-	0.173409	100		BP3_g_in_13	9.2984	0.0271	2.3225	0.4693	0.0081	0.0031	0.1226	1.5873	0.9301	0.0014	-	0.0398	14.8098
	BP3_g_in_14	68.2655	0.276894	14.1507	4.45238	0.136441	0.0300972	0.879842	6.04753	5.53187	0.054175	-	0.174564	100		BP3_g_in_14	9.2932	0.0283	2.2706	0.5069	0.0157	0.0061	0.1283	1.5964	0.9607	0.0062	-	0.0402	14.8526
	BP3_g_in_15	68.1479	0.307847	14.3863	4.2666	0.0503018	-	0.837022	5.96579	5.79276	-	0.104628	0.140845	100		BP3_g_in_15	9.2834	0.0315	2.31	0.486	0.0057	-	0.1222	1.5757	1.0068	-	0.0449	0.0324	14.8986
Host glass
Element		SiO2	TiO2	Al2O3	FeO	MnO	MgO	CaO	Na2O	K2O	P2O5	F	Cl	Total		Cation	Si	Ti	Al	Fe	Mn	Mg	Ca	Na	K	P	F	Cl	Total
17-1_L2	BP3_g_out_1	71.4711	0.271411	11.728	4.35077	0.103443	-	0.494684	5.90651	4.93251	-	0.425039	0.316475	100		BP3_g_out_1	9.6791	0.0277	1.8722	0.4928	0.0119	-	0.0719	1.551	0.8523	-	0.1801	0.0719	14.8109
	BP3_g_out_2	73.9246	0.220723	10.3139	4.26835	0.0911908	-	0.252847	5.35331	4.95332	0.0259065	0.14404	0.451809	100		BP3_g_out_2	9.9262	0.0223	1.6324	0.4793	0.0104	-	0.0363	1.3936	0.8486	0.0029	0.0608	0.102	14.5149
	BP3_g_out_3	73.0299	0.226058	10.7713	4.26862	0.138486	-	0.311593	5.54147	4.82562	0.00814622	0.458225	0.420549	100		BP3_g_out_3	9.8505	0.0229	1.7125	0.4815	0.0158	-	0.045	1.4493	0.8304	0.001	0.1932	0.0949	14.6971
	BP3_g_out_4	73.342	0.262488	11.0145	4.01717	0.0968112	-	0.378262	5.37053	5.07211	0.0329358	-	0.413194	100		BP3_g_out_4	9.8384	0.0264	1.7416	0.4506	0.011	-	0.0544	1.397	0.8681	0.0038	-	0.0936	14.485
	BP3_g_out_5	73.6593	0.248649	10.6458	4.21701	0.132345	0.0280733	0.351919	5.37102	4.87372	0.0250654	0.0350916	0.412076	100		BP3_g_out_5	9.8794	0.0251	1.6829	0.473	0.015	0.0056	0.0506	1.3967	0.8339	0.0028	0.0148	0.0932	14.473
	BP3_g_out_6	73.4019	0.203931	10.587	4.4291	0.0748089	-	0.34945	5.31553	4.95891	0.0122973	0.249021	0.41811	100		BP3_g_out_6	9.8794	0.0206	1.6796	0.4986	0.0086	-	0.0504	1.3872	0.8515	0.0015	0.1051	0.0946	14.5772
	BP3_g_out_7	73.4212	0.217238	10.6621	4.28327	0.0553341	-	0.311511	5.32232	4.92371	-	0.355573	0.447796	100		BP3_g_out_7	9.8838	0.022	1.6917	0.4823	0.0063	-	0.045	1.3892	0.8457	-	0.1498	0.1012	14.6171
	BP3_g_out_8	74.2159	0.20491	10.2577	4.19355	0.0892676	0.00912964	0.279976	5.30635	4.95435	0.0294177	-	0.459525	100		BP3_g_out_8	9.943	0.0206	1.6198	0.4699	0.0102	0.0017	0.0403	1.3785	0.8468	0.0033	-	0.1038	14.4379
	BP3_g_out_9	73.2112	0.267725	10.9666	4.09223	0.0458085	-	0.415331	5.4502	5.06439	0.00407187	0.0712577	0.411259	100		BP3_g_out_9	9.8355	0.0271	1.7365	0.4598	0.0052	-	0.0598	1.4199	0.8679	0.0005	0.03	0.0932	14.5354
	BP3_g_out_10	72.9977	0.249491	10.9582	4.18409	0.0705529	-	0.374237	5.64218	5.09412	-	0.0357877	0.393665	100		BP3_g_out_10	9.819	0.0253	1.7374	0.4707	0.008	-	0.0539	1.4716	0.8742	-	0.0151	0.0893	14.5646
	BP3_g_out_11	72.6175	0.256733	11.2623	4.44538	0.115879	0.00599377	0.506473	5.71506	4.76604	-	-	0.308679	100		BP3_g_out_11	9.7647	0.026	1.785	0.4999	0.0132	0.0012	0.073	1.4901	0.8176	-	-	0.0702	14.5409

## Sheet: BP5
Glass in bubble pocket (BP5)
Element		SiO2	TiO2	Al2O3	FeO	MnO	MgO	CaO	Na2O	K2O	P2O5	F	Cl	Total		Cation	Si	Ti	Al	Fe	Mn	Mg	Ca	Na	K	P	F	Cl	Total
17-1_S2	BP5_g_in_1	70.0828	0.279854	13.0789	4.10652	0.0822509	-	0.522594	5.96018	5.36536	-	0.24274	0.27885	100		BP5_g_in_1	9.5041	0.0285	2.0906	0.4657	0.0094	-	0.0759	1.5672	0.9283	-	0.1035	0.0636	14.8368
	BP5_g_in_2	69.5587	0.318836	13.0089	4.49891	0.11466	0.0311796	0.700032	5.84768	5.37898	-	0.278605	0.263518	100		BP5_g_in_2	9.4662	0.0327	2.0867	0.5121	0.0132	0.0063	0.1021	1.543	0.9338	-	0.1188	0.0603	14.8752
	BP5_g_in_3	69.4516	0.299177	13.1729	4.50484	0.0980412	-	0.667084	6.17963	5.37609	-	-	0.250662	100		BP5_g_in_3	9.4369	0.0306	2.1098	0.5119	0.0113	-	0.0971	1.628	0.932	-	-	0.0576	14.8153
	BP5_g_in_4	69.9439	0.287192	13.1168	4.30889	0.106071	-	0.605406	5.95999	5.31556	-	0.10407	0.252169	100		BP5_g_in_4	9.4828	0.0293	2.0962	0.4885	0.0121	-	0.088	1.5667	0.9194	-	0.0444	0.0576	14.785
	BP5_g_in_5	69.9433	0.243427	13.0693	4.4837	0.107067	-	0.534327	5.86952	5.33721	-	0.174742	0.237367	100		BP5_g_in_5	9.4909	0.0248	2.0903	0.5088	0.0123	-	0.0778	1.5444	0.924	-	0.0746	0.0544	14.8024
	BP5_g_in_6	70.0093	0.284234	12.9377	4.41672	0.103816	0.0151188	0.67934	5.98706	5.26639	0.0251981	-	0.275163	100		BP5_g_in_6	9.489	0.029	2.067	0.5006	0.012	0.0031	0.0986	1.5735	0.9107	0.0029	-	0.0631	14.7495
	BP5_g_in_7	70.1973	0.276963	12.9406	4.46309	0.10731	-	0.644884	5.69358	5.41969	-	-	0.256523	100		BP5_g_in_7	9.5084	0.0283	2.0661	0.5056	0.0124	-	0.0936	1.4954	0.9366	-	-	0.0587	14.7051
	BP5_g_in_8	70.2221	0.257286	12.6673	4.60603	0.110553	0.0241206	0.656281	5.75276	5.24523	-	0.173869	0.284422	100		BP5_g_in_8	9.5305	0.0263	2.0264	0.5228	0.0127	0.0049	0.0955	1.5138	0.9083	-	0.0741	0.065	14.7803
	BP5_g_in_9	69.749	0.291875	13.1273	4.47912	0.0828157	0.0212089	0.643337	6.01222	5.31334	0.0212089	-	0.258547	100		BP5_g_in_9	9.4604	0.0298	2.0986	0.5081	0.0095	0.0044	0.0935	1.5811	0.9194	0.0024	-	0.0594	14.7666
	BP5_g_in_10	69.9474	0.319687	12.8995	4.43795	0.0834852	-	0.709624	5.95697	5.28298	-	0.105884	0.256564	100		BP5_g_in_10	9.4914	0.0326	2.0631	0.5036	0.0096	-	0.1031	1.5673	0.9146	-	0.0452	0.0588	14.7893
	BP5_g_in_11	69.6845	0.27768	13.2327	4.23487	0.115111	-	0.580603	6.18468	5.44353	-	-	0.246378	100		BP5_g_in_11	9.4534	0.0284	2.116	0.4805	0.0133	-	0.0844	1.6269	0.9421	-	-	0.0566	14.8016
Host glass
Element		SiO2	TiO2	Al2O3	FeO	MnO	MgO	CaO	Na2O	K2O	P2O5	F	Cl	Total		Cation	Si	Ti	Al	Fe	Mn	Mg	Ca	Na	K	P	F	Cl	Total
17-1_S2	BP5_g_out_1	73.4272	0.252103	10.9455	4.29187	0.0990038	-	0.295991	5.4003	4.85323	-	-	0.4348	100		BP5_g_out_1	9.8501	0.0254	1.7307	0.4816	0.0113	-	0.0426	1.4046	0.8305	-	-	0.0984	14.4752
	BP5_g_out_2	73.5881	0.196592	10.5676	4.16877	0.0887186	-	0.268172	5.48946	4.81399	-	0.384111	0.43452	100		BP5_g_out_2	9.8998	0.0199	1.6757	0.4691	0.0101	-	0.0387	1.4318	0.8263	-	0.1617	0.098	14.6311
	BP5_g_out_3	72.1503	0.248903	11.4729	4.23541	0.0548602	0.0386053	0.309859	5.66381	5.038	0.00812744	0.386053	0.393165	100		BP5_g_out_3	9.7468	0.0253	1.8268	0.4785	0.0063	0.0077	0.0448	1.4835	0.8683	0.001	0.1633	0.0891	14.7415
	BP5_g_out_4	74.3113	0.191399	10.3345	4.37234	0.0926126	-	0.274751	5.21203	4.77264	0.00411612	-	0.43425	100		BP5_g_out_4	9.9457	0.0193	1.6303	0.4894	0.0106	-	0.0395	1.3527	0.8149	0.0005	-	0.0982	14.4011

## Sheet: BP7
Glass in bubble pocket (BP7)
Element		SiO2	TiO2	Al2O3	FeO	MnO	MgO	CaO	Na2O	K2O	P2O5	F	Cl	Total		Cation	Si	Ti	Al	Fe	Mn	Mg	Ca	Na	K	P	F	Cl	Total
16-6B3	BP7_g_in_1	74.3419	0.199841	10.1837	4.15588	0.0989009	-	0.22737	5.43853	4.75744	0.0173331	0.106038	0.473093	100		BP7_g_in_1	9.9601	0.0201	1.6081	0.4657	0.0112	-	0.0326	1.413	0.8132	0.0019	0.0448	0.1067	14.4774
	BP7_g_in_2	74.4688	0.217187	10.1079	4.30398	0.0326291	-	0.217187	5.48169	4.70165	0.00815727	-	0.460886	100		BP7_g_in_2	9.9665	0.0218	1.5945	0.4817	0.0037	-	0.0311	1.4226	0.8027	0.001	-	0.1041	14.4298
	BP7_g_in_3	74.2844	0.174162	10.041	4.3766	0.0860568	-	0.195677	5.44821	4.7782	0.0553222	0.0706895	0.489704	100		BP7_g_in_3	9.9614	0.0175	1.5871	0.4908	0.0098	-	0.0281	1.4166	0.8174	0.0063	0.03	0.1108	14.4759
	BP7_g_in_4	74.7602	0.204862	9.83642	4.2491	0.052999	-	0.204862	5.21021	4.75361	-	0.247669	0.480049	100		BP7_g_in_4	10.017	0.0207	1.5534	0.4762	0.006	-	0.0293	1.3537	0.8126	-	0.1042	0.108	14.4811
	BP7_g_in_5	73.8486	0.210874	10.2852	4.41011	0.0790778	-	0.233178	5.5172	4.83084	-	0.140921	0.444052	100		BP7_g_in_5	9.9218	0.0213	1.6288	0.4955	0.009	-	0.0336	1.4373	0.828	-	0.0594	0.1005	14.5352
	BP7_g_in_6	73.5877	0.181145	10.4736	4.25741	0.0972245	-	0.231292	5.54487	4.91649	0.0214917	0.24869	0.440069	100		BP7_g_in_6	9.8989	0.0183	1.6607	0.4789	0.0111	-	0.0334	1.4464	0.8438	0.0024	0.1049	0.0995	14.5983
	BP7_g_in_7	73.882	0.197546	10.2939	4.32144	0.114638	0.038895	0.225181	5.64284	4.66023	-	0.106449	0.516894	100		BP7_g_in_7	9.9217	0.02	1.6295	0.4853	0.013	0.0077	0.0324	1.4694	0.7984	-	0.0449	0.1168	14.5391
	BP7_g_in_8	74.609	0.205723	10.2115	4.04589	0.026611	0.0092115	0.192418	5.48186	4.74187	0.0255875	-	0.45034	100		BP7_g_in_8	9.97	0.0206	1.6084	0.4522	0.003	0.0017	0.0276	1.4204	0.8085	0.0029	-	0.1016	14.417
	BP7_g_in_9	74.2427	0.17938	10.1258	4.27657	0.0896898	-	0.227282	5.55159	4.77802	-	0.0703249	0.458641	100		BP7_g_in_9	9.9552	0.0181	1.6004	0.4795	0.0102	-	0.0327	1.4433	0.8174	-	0.0299	0.1037	14.4904
	BP7_g_in_10	74.2643	0.190908	10.3039	4.1733	0.0348972	0.0164222	0.245307	5.45115	4.81992	0.0379764	-	0.461875	100		BP7_g_in_10	9.9415	0.0192	1.6259	0.4673	0.004	0.0033	0.0351	1.415	0.8232	0.0043	-	0.1043	14.4431
Host glass
Element		SiO2	TiO2	Al2O3	FeO	MnO	MgO	CaO	Na2O	K2O	P2O5	F	Cl	Total		Cation	Si	Ti	Al	Fe	Mn	Mg	Ca	Na	K	P	F	Cl	Total
16-6B3	BP7_g_out_1	71.383	0.345442	11.8889	4.47252	0.0506514	0.0607817	0.640233	5.39235	5.06007	0.0455862	0.316065	0.344429	100		BP7_g_out_1	9.6562	0.0352	1.8956	0.506	0.0057	0.0122	0.0928	1.4144	0.8732	0.0053	0.1339	0.0782	14.7088
	BP7_g_out_2	66.633	0.497698	14.5281	4.52572	0.122153	0.163544	1.09231	6.22274	5.3283	0.0868196	0.62389	0.175658	100		BP7_g_out_2	9.1582	0.0514	2.3535	0.5202	0.0142	0.0335	0.1609	1.6585	0.9343	0.0101	0.2678	0.0405	15.2031
	BP7_g_out_3	72.9598	0.312733	11.1306	4.3752	0.0797163	0.0756283	0.399603	5.31544	4.81364	0.0214621	0.106288	0.409823	100		BP7_g_out_3	9.8039	0.0316	1.7629	0.4917	0.009	0.0152	0.0575	1.3849	0.8251	0.0024	0.0451	0.0929	14.5223
	BP7_g_out_4	71.6019	0.331244	11.7663	4.53314	0.0899676	0.0787216	0.547984	5.49518	4.90221	0.0419167	0.212651	0.39872	100		BP7_g_out_4	9.6747	0.0337	1.8739	0.5123	0.0103	0.0159	0.0794	1.4398	0.845	0.0048	0.0902	0.0906	14.6706
	BP7_g_out_5	65.7922	0.387258	15.0634	4.97134	0.117905	0.116889	1.09164	6.83648	5.07298	-	0.382176	0.16771	100		BP7_g_out_5	9.0609	0.0402	2.4453	0.5725	0.0138	0.024	0.1611	1.8256	0.8914	-	0.165	0.0387	15.2386
	BP7_g_out_6	72.1776	0.27252	11.7247	4.38672	0.0686581	0.0179567	0.465819	5.41765	4.98458	0.0179567	0.0728832	0.392936	100		BP7_g_out_6	9.7201	0.0276	1.8611	0.494	0.0078	0.0036	0.0672	1.4146	0.8564	0.002	0.0311	0.0891	14.5746
	BP7_g_out_7	73.1992	0.292185	11.0788	4.30788	0.104427	0.00527409	0.40505	5.31312	4.88592	0.034809	-	0.373406	100		BP7_g_out_7	9.8199	0.0295	1.7518	0.4833	0.0119	0.0011	0.0582	1.3821	0.8362	0.004	-	0.0846	14.4626
	BP7_g_out_8	72.5674	0.275965	11.0749	4.50881	0.109971	0.0570605	0.448184	5.47677	4.72668	0.042536	0.322651	0.389049	100		BP7_g_out_8	9.7857	0.028	1.7604	0.5085	0.0125	0.0116	0.0648	1.4319	0.8132	0.0049	0.1365	0.0882	14.6462
	BP7_g_out_9	71.7669	0.376427	11.5324	4.49038	0.0977065	0.0874216	0.582125	5.52402	5.03034	0.0298262	0.106963	0.375399	100		BP7_g_out_9	9.6924	0.0382	1.8358	0.5072	0.0111	0.0175	0.0842	1.4465	0.8667	0.0034	0.0455	0.0854	14.6339
	BP7_g_out_10	72.3588	0.319125	11.4168	4.41781	0.0911785	0.0217092	0.445038	5.29052	4.99745	0.00434183	0.18887	0.448294	100		BP7_g_out_10	9.7568	0.0323	1.8146	0.4982	0.0104	0.0043	0.0642	1.3834	0.8597	0.0005	0.0797	0.1018	14.6059
	BP7_g_out_11	72.0985	0.336271	11.5426	4.36751	0.0692618	0.0772922	0.609303	5.46365	4.84532	0.0331252	0.208789	0.348317	100		BP7_g_out_11	9.7186	0.0341	1.8339	0.4923	0.0079	0.0155	0.0879	1.428	0.8332	0.0038	0.0884	0.079	14.6227
	BP7_g_out_12	71.7523	0.31027	11.8378	4.2599	0.0757989	0.0950013	0.622562	5.58284	4.96533	0.0505326	0.0707457	0.376973	100		BP7_g_out_12	9.6732	0.0315	1.8811	0.4803	0.0087	0.0191	0.0899	1.4593	0.854	0.0057	0.0298	0.0858	14.6185
	BP7_g_out_13	73.7712	0.305034	11.0171	4.22339	0.0767703	0.00921244	0.423772	5.07708	4.72291	0.00409442	-	0.369521	100		BP7_g_out_13	9.8641	0.0306	1.7364	0.4723	0.0088	0.0019	0.0608	1.3164	0.8057	0.0005	-	0.0835	14.3811
	BP7_g_out_14	73.1463	0.308955	10.9827	4.41108	0.0931099	0.0391485	0.447562	5.04909	4.7486	0.0391485	0.294143	0.440156	100		BP7_g_out_14	9.8354	0.0312	1.7406	0.4961	0.0107	0.0078	0.0645	1.3164	0.8147	0.0045	0.1239	0.0995	14.5454
Feldspar in BP7
Element		SiO2	TiO2	Al2O3	FeO	MnO	MgO	Cr2O3	CaO	Na2O	K2O	Total				Cation	Si	Ti	Al	Fe	Mn	Mg	Cr	Ca	Na	K	Total
16-6B3	BP7_f_1	67.28	0.008	18.263	0.502	-	-	-	0.012	7.209	6.594	99.871				BP7_f_1	3.01553	0.000266667	0.964833	0.0188	-	-	-	0.000566667	0.6265	0.377067	5.00393
	BP7_f_2	67.82	0.014	17.963	0.556	-	-	-	-	7.334	6.632	100.43				BP7_f_2	3.02723	0.000466667	0.9451	0.0207667	-	-	-	-	0.634733	0.377667	5.03153
	BP7_f_3	68.259	-	18.054	0.665	0.006	-	-	-	7.453	6.571	101.09				BP7_f_3	3.0267	-	0.9436	0.0246333	0.000233333	-	-	-	0.640833	0.371733	5.0274
	BP7_f_4	66.724	0.007	18.152	0.606	0.013	-	-	0.016	7.325	6.522	99.383				BP7_f_4	3.00957	0.000233333	0.965033	0.0228667	0.0005	-	-	0.0008	0.6406	0.3753	5.01617
	BP7_f_5	67.915	0.018	17.991	0.66	0.004	-	-	-	7.348	6.453	100.501				BP7_f_5	3.02673	0.0006	0.9451	0.0246	0.000166667	-	-	-	0.635	0.366933	5.02053
	BP7_f_6	67.098	0.022	17.999	0.448	0.015	-	-	0.004	7.282	6.445	99.314				BP7_f_6	3.02213	0.000766667	0.955567	0.0168667	0.000566667	-	-	0.0002	0.635967	0.370367	5.0025

## Sheet: BP8
Glass in bubble pocket (BP8)
Element		SiO2	TiO2	Al2O3	FeO	MnO	MgO	CaO	Na2O	K2O	P2O5	F	Cl	Total		Cation	Si	Ti	Al	Fe	Mn	Mg	Ca	Na	K	P	F	Cl	Total
16-6B3	BP8_g_in_1	67.5251	0.357798	14.5212	4.69821	0.0468426	0.0677723	0.908946	6.35066	5.21548	0.114615	-	0.19335	100		BP8_g_in_1	9.2061	0.0367	2.3336	0.5357	0.0055	0.0138	0.1328	1.6788	0.9072	0.0133	-	0.0446	14.9081
	BP8_g_in_2	70.1546	0.252598	12.6776	4.71384	0.074586	0.0676247	0.70807	5.91418	5.02312	0.0119338	0.172045	0.229725	100		BP8_g_in_2	9.5161	0.0258	2.0269	0.5348	0.0086	0.0136	0.1029	1.5555	0.8693	0.0014	0.0734	0.0526	14.7809
	BP8_g_in_3	67.1527	0.369262	14.4493	4.68833	0.142101	0.0810576	0.883627	6.58367	5.26474	-	0.206146	0.179127	100		BP8_g_in_3	9.1959	0.0381	2.3323	0.5369	0.0165	0.0166	0.1296	1.7482	0.9197	-	0.0889	0.0413	15.064
	BP8_g_in_4	69.548	0.326512	13.0605	4.61583	0.136956	0.0565689	0.756237	5.9705	5.25198	0.0535916	-	0.223298	100		BP8_g_in_4	9.441	0.0333	2.0897	0.524	0.0157	0.0114	0.1099	1.5716	0.9096	0.0061	-	0.0512	14.7635
	BP8_g_in_5	68.6406	0.355342	13.633	4.52515	0.105213	0.0506214	0.827808	6.15695	5.08794	0.032755	0.342439	0.242188	100		BP8_g_in_5	9.358	0.0364	2.1908	0.516	0.0121	0.0102	0.121	1.6275	0.885	0.0038	0.1462	0.0555	14.9626
	BP8_g_in_6	69.2989	0.28134	13.2851	4.6256	0.0911102	0.0400485	0.71887	5.96422	5.15123	0.0500606	0.242293	0.251304	100		BP8_g_in_6	9.4253	0.0288	2.1298	0.5261	0.0104	0.008	0.1047	1.5729	0.8938	0.0057	0.1034	0.0576	14.8665
	BP8_g_in_7	69.9702	0.309708	12.565	4.64264	0.153861	0.0625372	0.711733	5.96089	5.11416	0.00794123	0.240222	0.261068	100		BP8_g_in_7	9.5118	0.0316	2.0133	0.5278	0.0177	0.0126	0.1037	1.5712	0.8869	0.0009	0.1024	0.0597	14.8397
	BP8_g_in_8	68.2299	0.32089	13.9198	4.57617	0.152472	0.0528173	0.844079	6.55333	5.14121	0.0209276	-	0.188348	100		BP8_g_in_8	9.2952	0.0328	2.2351	0.5214	0.0176	0.0106	0.1232	1.731	0.8936	0.0024	-	0.0434	14.9064
	BP8_g_in_9	67.8799	0.365542	14.3116	4.24881	0.100053	0.0782597	0.741981	6.60947	5.15226	0.00792503	0.306104	0.198126	100		BP8_g_in_9	9.2629	0.0376	2.3019	0.4849	0.0116	0.0159	0.1085	1.749	0.8971	0.0009	0.1312	0.0456	15.0471
Host glass
Element		SiO2	TiO2	Al2O3	FeO	MnO	MgO	CaO	Na2O	K2O	P2O5	F	Cl	Total		Cation	Si	Ti	Al	Fe	Mn	Mg	Ca	Na	K	P	F	Cl	Total
16-6B3	BP8_g_out_1	73.1049	0.243786	11.1037	4.15829	0.0467671	0.0308464	0.412944	5.20408	5.04388	0.00398018	0.276622	0.370157	100		BP8_g_out_1	9.8302	0.0246	1.7598	0.4676	0.0054	0.0061	0.0594	1.3568	0.8653	0.0005	0.1167	0.0836	14.576
	BP8_g_out_2	73.0886	0.287412	11.0036	4.15128	0.0637568	-	0.407841	5.35557	5.06411	-	0.211511	0.366349	100		BP8_g_out_2	9.8298	0.029	1.7444	0.467	0.0072	-	0.0588	1.3968	0.8688	-	0.0892	0.0828	14.5738
Feldspar in BP8
Element		SiO2	TiO2	Al2O3	FeO	MnO	MgO	Cr2O3	CaO	Na2O	K2O	Total				Cation	Si	Ti	Al	Fe	Mn	Mg	Cr	Ca	Na	K	Total
16-6B3	BP8_f_1	66.534	0.089	19.201	0.158	0.019	-	0.009	0.589	6.377	7.845	100.821				BP8_f_1	2.9715	0.003	1.0108	0.0059	0.0007	-	0.0003	0.0282	0.5523	0.447	5.0197
	BP8_f_2	66.106	-	19.054	0.226	-	-	-	0.759	6.307	7.593	100.045				BP8_f_2	2.9734	-	1.0102	0.0085	-	-	-	0.0366	0.5501	0.4357	5.0146
	BP8_f_3	66.411	0.089	19.388	0.157	0.013	-	-	0.686	6.312	7.714	100.77				BP8_f_3	2.9656	0.003	1.0205	0.0058	0.0005	-	-	0.0328	0.5465	0.4395	5.0143
	BP8_f_4	66.635	0.061	19.305	0.202	0.002	-	-	0.528	6.254	8.108	101.095				BP8_f_4	2.9704	0.002	1.0143	0.0075	0.0001	-	-	0.0252	0.5405	0.4611	5.0212
	BP8_f_5	66.434	-	19.237	0.204	-	-	-	0.554	6.228	7.935	100.592				BP8_f_5	2.9734	-	1.0149	0.0076	-	-	-	0.0266	0.5405	0.4531	5.0162
	BP8_f_6	66.213	0.017	19.037	0.149	0.011	-	-	0.715	6.365	7.527	100.034				BP8_f_6	2.9762	0.0006	1.0086	0.0056	0.0004	-	-	0.0344	0.5547	0.4316	5.0121
	BP8_f_7	66.089	0.066	19.093	0.149	0.022	-	-	0.596	6.271	7.805	100.091				BP8_f_7	2.9724	0.0022	1.0121	0.0056	0.0008	-	-	0.0287	0.5469	0.4479	5.0166

## Sheet: BP9
Glass in bubble pocket (BP9)
Element		SiO2	TiO2	Al2O3	FeO	MnO	MgO	CaO	Na2O	K2O	P2O5	F	Cl	Total		Cation	Si	Ti	Al	Fe	Mn	Mg	Ca	Na	K	P	F	Cl	Total
16-6B4	BP9_g_in_1	74.7555	0.219813	9.82465	4.21941	0.0879253	-	0.190838	5.37443	4.704	0.032972	0.138882	0.451616	100		BP9_g_in_1	10.0063	0.0221	1.55	0.4723	0.01	-	0.0274	1.3949	0.8032	0.0038	0.0585	0.1019	14.4504
	BP9_g_in_2	74.7701	0.229619	9.76585	4.33758	0.060426	-	0.220555	5.42827	4.70819	0.0292059	-	0.450174	100		BP9_g_in_2	10.003	0.0231	1.54	0.4853	0.0069	-	0.0316	1.408	0.8035	0.0033	-	0.1016	14.4063
	BP9_g_in_3	74.5705	0.177139	9.91274	4.14062	0.0412653	-	0.187204	5.51144	4.67405	-	0.314019	0.471029	100		BP9_g_in_3	10.0007	0.0179	1.567	0.4644	0.0047	-	0.0269	1.4332	0.7997	-	0.132	0.106	14.5525
	BP9_g_in_4	74.6065	0.185281	9.91055	4.14691	0.0776985	-	0.202215	5.19783	4.70973	-	0.51799	0.445272	100		BP9_g_in_4	10.0139	0.0187	1.568	0.4655	0.0088	-	0.0291	1.3527	0.8065	-	0.2172	0.0999	14.5803
	BP9_g_in_5	74.6988	0.169673	9.86795	4.15498	0.0748555	0.0239538	0.196621	5.32472	4.66999	0.00399229	0.346332	0.468097	100		BP9_g_in_5	10.0136	0.0171	1.5592	0.4658	0.0086	0.0048	0.0282	1.3842	0.7986	0.0005	0.1454	0.1054	14.5314
	BP9_g_in_6	74.4789	0.199697	9.98184	4.15851	0.0582031	0.0270946	0.232813	5.34666	4.72248	-	0.314096	0.479674	100		BP9_g_in_6	9.9903	0.0202	1.5783	0.4666	0.0066	0.0055	0.0335	1.3907	0.8081	-	0.1318	0.108	14.5396
	BP9_g_in_7	74.6331	0.209937	10.0952	4.13282	0.122717	-	0.218051	5.38331	4.76567	-	-	0.439144	100		BP9_g_in_7	9.9797	0.0211	1.5911	0.4622	0.0138	-	0.0313	1.3959	0.8131	-	-	0.0992	14.4074
	BP9_g_in_8	73.9333	0.214094	10.4209	4.00008	0.0906167	0.0199158	0.275833	5.48878	4.83754	0.0697051	0.242972	0.406281	100		BP9_g_in_8	9.9175	0.0216	1.6477	0.4487	0.0102	0.0041	0.0397	1.4278	0.8278	0.008	0.1021	0.0916	14.5469
	BP9_g_in_9	74.6899	0.205394	10.0246	4.24977	0.0615189	-	0.208371	5.12988	4.64369	0.0208371	0.310571	0.455438	100		BP9_g_in_9	10.0019	0.0207	1.5822	0.4759	0.007	-	0.03	1.332	0.7934	0.0023	0.1301	0.1024	14.4779
	BP9_g_in_10	74.8217	0.195383	9.97361	4.05874	0.0956774	-	0.213512	5.36398	4.70733	0.0171212	0.105749	0.447166	100		BP9_g_in_10	10.0033	0.0196	1.5717	0.4538	0.0108	-	0.0306	1.3906	0.8029	0.0019	0.0443	0.1007	14.4303
Feldspar in BP9
Element		SiO2	TiO2	Al2O3	FeO	MnO	MgO	Cr2O3	CaO	Na2O	K2O	Total				Cation	Si	Ti	Al	Fe	Mn	Mg	Cr	Ca	Na	K	Total
16-6B4	BP9_f_1	67.332	0.006	18.283	0.556	-	-	`	0.028	7.251	6.676	100.132				BP9_f_1	3.013	0.0002	0.9643	0.0208	-	-	-	0.0013	0.6291	0.3811	5.0098
	BP9_f_2	67.03	0.044	18.192	0.491	0.013	-	0.016	0.001	7.395	6.546	99.728				BP9_f_2	3.0113	0.0015	0.9633	0.0185	0.0005	-	0.0006	-	0.6442	0.3752	5.0152
	BP9_f_3	67.293	-	18.382	0.47	-	-	-	0.006	7.249	6.683	100.083				BP9_f_3	3.0112	-	0.9696	0.0176	-	-	-	0.0003	0.629	0.3815	5.0093
	BP9_f_4	66.741	0.017	18.295	0.507	-	0.005	0.013	0.018	7.274	6.607	99.477				BP9_f_4	3.0066	0.0006	0.9714	0.0191	-	0.0003	0.0004	0.0009	0.6354	0.3797	5.0144
	BP9_f_5	66.321	0.028	17.983	0.66	0.017	-	-	0.015	7.328	6.563	98.915				BP9_f_5	3.0086	0.0009	0.9616	0.0251	0.0007	-	-	0.0007	0.6446	0.3798	5.022

## Sheet: BP10
Glass in bubble pocket (BP10)
Element		SiO2	TiO2	Al2O3	FeO	MnO	MgO	CaO	Na2O	K2O	P2O5	F	Cl	Total		Cation	Si	Ti	Al	Fe	Mn	Mg	Ca	Na	K	P	F	Cl	Total
16-6B5	BP10_g_in_1	74.9794	0.219356	9.89817	3.97658	0.0583607	-	0.2103	5.20919	4.81073	-	0.140871	0.497072	100		BP10_g_in_1	10.0246	0.0221	1.5599	0.4446	0.0066	-	0.0302	1.3504	0.8205	-	0.059	0.1119	14.4299
	BP10_g_in_2	74.3374	0.189164	10.3039	4.09889	0.0758679	0.0111273	0.242777	5.4898	4.80598	-	-	0.445092	100		BP10_g_in_2	9.9484	0.019	1.6254	0.4588	0.0087	0.0022	0.0348	1.4247	0.8206	-	-	0.1006	14.4432
	BP10_g_in_3	74.3219	0.22293	10.2507	3.96955	0.0471968	0.00903769	0.210879	5.49291	4.77893	-	0.244018	0.451884	100		BP10_g_in_3	9.9607	0.0225	1.6192	0.4449	0.0054	0.0019	0.0303	1.4275	0.8172	-	0.1028	0.1017	14.5341
	BP10_g_in_4	74.9935	0.245395	9.7254	4.20053	0.100344	0.00894152	0.21559	5.31822	4.69033	0.00794802	0.0347726	0.458998	100		BP10_g_in_4	10.0237	0.0246	1.5321	0.4695	0.0114	0.0019	0.0309	1.3783	0.7999	0.0009	0.0146	0.1035	14.3913
	BP10_g_in_5	74.7701	0.163785	10.0521	4.18203	0.0301444	-	0.205987	5.37675	4.70956	0.0371781	-	0.472262	100		BP10_g_in_5	9.9917	0.0164	1.5833	0.4673	0.0034	-	0.0295	1.3931	0.803	0.0042	-	0.1065	14.3984
	BP10_g_in_6	74.5855	0.210378	9.88475	4.11999	0.0694549	0.00603956	0.234536	5.47587	4.67764	0.0372439	0.244602	0.453974	100		BP10_g_in_6	9.9946	0.0212	1.5614	0.4617	0.0079	0.0012	0.0336	1.4228	0.7997	0.0043	0.1028	0.1022	14.5134
	BP10_g_in_7	74.3605	0.174808	10.2072	4.18031	0.0954409	-	0.211979	5.40698	4.78511	0.0411903	0.104483	0.431996	100		BP10_g_in_7	9.9581	0.0176	1.6111	0.4682	0.0108	-	0.0304	1.4039	0.8175	0.0047	0.0442	0.0976	14.4641
	BP10_g_in_8	73.8254	0.197632	10.5232	4.13508	0.107431	0.014189	0.235132	5.35837	4.81007	0.004054	0.351684	0.437832	100		BP10_g_in_8	9.918	0.0199	1.6663	0.4646	0.0122	0.0028	0.0338	1.3959	0.8244	0.0005	0.148	0.0986	14.585
	BP10_g_in_9	74.5102	0.235127	10.2105	4.19226	0.063034	-	0.217117	5.25484	4.68753	-	0.209113	0.420227	100		BP10_g_in_9	9.9734	0.0237	1.6109	0.4693	0.0071	-	0.0311	1.3638	0.8004	-	0.0879	0.0945	14.4621
	BP10_g_in_10	74.9288	0.218888	9.54413	4.56367	0.115941	-	0.221887	5.0894	4.65163	-	0.207894	0.457767	100		BP10_g_in_10	10.0398	0.022	1.5074	0.5114	0.0132	-	0.0319	1.3222	0.7952	-	0.0876	0.1032	14.4339
Feldspar in BP10
Element		SiO2	TiO2	Al2O3	FeO	MnO	MgO	Cr2O3	CaO	Na2O	K2O	Total				Cation	Si	Ti	Al	Fe	Mn	Mg	Cr	Ca	Na	K	Total
16-6B5	BP10_f_1	66.72	-	18.421	0.523	0.002	-	0.006	0.008	7.323	6.591	99.594				BP10_f_1	3.0026	-	0.9771	0.0197	0.0001	-	0.0002	0.0004	0.639	0.3784	5.0175
	BP10_f_2	66.304	-	18.085	0.58	-	-	0.009	0.013	7.177	6.531	98.699				BP10_f_2	3.0101	-	0.9678	0.022	-	-	0.0003	0.0006	0.6318	0.3783	5.011
	BP10_f_3	66.655	-	18.28	0.489	-	-	0.025	0.007	7.389	6.555	99.4				BP10_f_3	3.0055	-	0.9715	0.0184	-	-	0.0009	0.0004	0.6461	0.3771	5.0199
	BP10_f_4	66.68	-	18.204	0.604	0.013	-	-	0.016	7.487	6.473	99.477				BP10_f_4	3.0059	-	0.9672	0.0228	0.0005	-	-	0.0007	0.6544	0.3723	5.0238
	BP10_f_5	66.75	0.05	18.308	0.546	-	-	-	0.016	7.46	6.366	99.496				BP10_f_5	3.0049	0.0017	0.9715	0.0205	-	-	-	0.0008	0.6512	0.3656	5.0162
	BP10_f_6	66.906	0.022	18.529	0.497	0.028	0.025	0.009	0.016	7.499	6.439	99.97				BP10_f_6	2.9988	0.0007	0.9789	0.0186	0.0011	0.0017	0.0003	0.0008	0.6517	0.3682	5.0209
	BP10_f_7	67.5	-	18.381	0.554	-	-	-	0.018	7.45	6.559	100.462				BP10_f_7	3.0102	-	0.9662	0.0207	-	-	-	0.0009	0.6442	0.3732	5.0154
	BP10_f_8	67.457	-	18.549	0.537	0.002	-	-	0.014	7.432	6.635	100.626				BP10_f_8	3.0046	-	0.9738	0.02	0.0001	-	-	0.0007	0.6419	0.377	5.0182

## Sheet: BP11
Glass in bubble pocket (BP11)
Element		SiO2	TiO2	Al2O3	FeO	MnO	MgO	CaO	Na2O	K2O	P2O5	F	Cl	Total		Cation	Si	Ti	Al	Fe	Mn	Mg	Ca	Na	K	P	F	Cl	Total
16-6B5	BP11_g_in_1	74.4982	0.207488	10.0642	4.15177	0.0523755	-	0.198423	5.27986	4.7138	-	0.384759	0.449221	100		BP11_g_in_1	9.991	0.0209	1.5909	0.4656	0.0059	-	0.0285	1.3729	0.8065	-	0.1614	0.101	14.5446
	BP11_g_in_2	74.6859	0.223232	10.198	3.93535	0.0828283	-	0.239394	5.32121	4.82727	0.0252525	-	0.461616	100		BP11_g_in_2	9.9777	0.0224	1.6058	0.4397	0.0094	-	0.0342	1.3785	0.8228	0.0028	-	0.1041	14.3975
	BP11_g_in_3	74.3226	0.194995	10.0219	4.26247	0.096482	-	0.204136	5.24049	4.87082	0.0172652	0.282337	0.486472	100		BP11_g_in_3	9.9792	0.0197	1.5861	0.4787	0.011	-	0.0293	1.3643	0.8344	0.0019	0.1189	0.1096	14.5331
	BP11_g_in_4	74.9312	0.194475	9.68382	4.27026	0.0726722	0.00716486	0.218017	5.4412	4.72574	-	-	0.455481	100		BP11_g_in_4	10.0218	0.0196	1.5266	0.4776	0.0083	0.0014	0.0313	1.4112	0.8064	-	-	0.1029	14.4071
	BP11_g_in_5	74.1613	0.181231	10.0706	4.27828	0.0590529	0.0427625	0.20974	5.44712	4.84336	0.0335991	0.211776	0.461224	100		BP11_g_in_5	9.9568	0.0183	1.5937	0.4803	0.0067	0.0085	0.0301	1.4181	0.8296	0.0038	0.0894	0.104	14.5394
	BP11_g_in_6	74.0893	0.214213	10.3509	4.20039	0.0788142	-	0.232401	5.49779	4.89557	0.00404175	-	0.436509	100		BP11_g_in_6	9.9286	0.0216	1.6351	0.4707	0.0089	-	0.0334	1.4287	0.8369	0.0005	-	0.0987	14.4632
	BP11_g_in_7	73.1977	0.232233	10.7762	4.49788	0.0754004	0.0211121	0.323719	5.48312	4.80552	-	0.173924	0.413194	100		BP11_g_in_7	9.8481	0.0235	1.7089	0.5061	0.0086	0.0043	0.0467	1.4304	0.8248	-	0.0736	0.0937	14.5687
	BP11_g_in_8	72.7554	0.229637	11.1252	4.19241	0.0894164	-	0.322102	5.77345	4.91993	0.0254024	0.105674	0.461307	100		BP11_g_in_8	9.7963	0.0233	1.7657	0.4721	0.0102	-	0.0464	1.5072	0.8451	0.0029	0.0448	0.1046	14.6186
	BP11_g_in_9	73.8253	0.195665	10.2704	4.22697	0.0393347	-	0.246094	5.4645	4.90978	0.0292489	0.349978	0.442768	100		BP11_g_in_9	9.9301	0.0198	1.6283	0.4755	0.0045	-	0.0354	1.4253	0.8425	0.0033	0.1474	0.1	14.6121
	BP11_g_in_10	75.0775	0.211471	9.51206	4.41809	0.104699	-	0.212508	5.38008	4.58084	0.0124395	-	0.490323	100		BP11_g_in_10	10.04	0.0213	1.4993	0.4941	0.0119	-	0.0304	1.3951	0.7815	0.0015	-	0.1106	14.3857
	BP11_g_in_11	74.0929	0.220491	10.4315	4.11482	0.0885989	-	0.222504	5.45588	4.80448	-	0.104708	0.464138	100		BP11_g_in_11	9.9304	0.0223	1.6479	0.4612	0.0101	-	0.032	1.4178	0.8215	-	0.0443	0.1048	14.4923
Host glass
Element		SiO2	TiO2	Al2O3	FeO	MnO	MgO	CaO	Na2O	K2O	P2O5	F	Cl	Total		Cation	Si	Ti	Al	Fe	Mn	Mg	Ca	Na	K	P	F	Cl	Total
16-6B5	BP11_g_out_1	74.0978	0.204223	10.3379	4.23738	0.0603616	-	0.23038	5.45266	4.79975	-	0.175049	0.404422	100		BP11_g_out_1	9.9365	0.0206	1.6341	0.4753	0.0069	-	0.0332	1.4178	0.8212	-	0.0736	0.0914	14.5106
	BP11_g_out_2	73.1564	0.258906	10.7632	4.16163	0.0846228	-	0.279054	5.62641	4.89603	0.0251854	0.348565	0.399944	100		BP11_g_out_2	9.8519	0.0263	1.7084	0.4687	0.0097	-	0.0403	1.4693	0.8412	0.0029	0.1472	0.0905	14.6565
	BP11_g_out_3	73.7969	0.174425	10.4221	4.26484	0.0433542	-	0.243993	5.45154	4.86676	-	0.31457	0.421443	100		BP11_g_out_3	9.9202	0.0176	1.6514	0.4795	0.0049	-	0.0351	1.421	0.8347	-	0.1323	0.0951	14.5919
	BP11_g_out_4	73.9452	0.219437	10.532	4.31423	0.0663414	0.0102064	0.23985	5.36141	4.90824	-	-	0.403152	100		BP11_g_out_4	9.9085	0.0221	1.6635	0.4834	0.0075	0.0021	0.0345	1.3929	0.8392	-	-	0.0912	14.4449
	BP11_g_out_5	73.4816	0.216378	10.6763	4.16275	0.1092	-	0.285134	5.52067	4.8867	0.00404445	0.2457	0.411523	100		BP11_g_out_5	9.8787	0.0218	1.6918	0.468	0.0124	-	0.041	1.439	0.8382	0.0005	0.1037	0.0931	14.5882
Feldspar in BP11
Element		SiO2	TiO2	Al2O3	FeO	MnO	MgO	Cr2O3	CaO	Na2O	K2O	Total				Cation	Si	Ti	Al	Fe	Mn	Mg	Cr	Ca	Na	K	Total
16-6B5	BP11_f_1	67.234	0.011	18.279	0.563	0.006	-	-	0.006	7.615	6.278	99.992				BP11_f_1	3.0104	0.0004	0.9647	0.0211	0.0002	-	-	0.0003	0.6611	0.3586	5.0168
	BP11_f_2	66.65	-	18.338	0.492	0.015	-	-	0.01	7.542	6.387	99.434				BP11_f_2	3.0032	-	0.9739	0.0185	0.0006	-	-	0.0005	0.659	0.3672	5.023
	BP11_f_3	66.967	-	18.282	0.469	-	-	-	0.015	7.398	6.4	99.531				BP11_f_3	3.0111	-	0.9689	0.0176	-	-	-	0.0007	0.645	0.3672	5.0106
	BP11_f_4	66.814	0.017	18.276	0.482	-	0.017	-	0.011	7.308	6.559	99.484				BP11_f_4	3.0084	0.0006	0.97	0.0181	-	0.0011	-	0.0005	0.6381	0.3768	5.0137
	BP11_f_5	66.514	0.017	18.303	0.526	-	-	0.009	-	7.45	6.397	99.216				BP11_f_5	3.0034	0.0006	0.9742	0.0198	-	-	0.0003	-	0.6523	0.3685	5.0191
	BP11_f_6	67.617	0.039	18.383	0.453	0.019	-	-	0.012	7.531	6.462	100.516				BP11_f_6	3.0115	0.0013	0.965	0.0169	0.0007	-	-	0.0006	0.6504	0.3672	5.0136
	BP11_f_7	67.122	-	18.199	0.573	-	-	0.038	0.002	7.513	6.332	99.779				BP11_f_7	3.0121	-	0.9626	0.0215	-	-	0.0013	0.0001	0.6538	0.3625	5.014
	BP11_f_8	67.816	-	18.514	0.509	-	-	-	0.02	7.48	6.258	100.597				BP11_f_8	3.0131	-	0.9696	0.0189	-	-	-	0.001	0.6444	0.3547	5.0017

[truncated: 9 more sheets: BP12, BP13, BP14, BP15, BP16, BP17, BP18, BP19, BP20]
